# Supplementary material for: Altered Plasma Membrane Lipid Composition in Hypertensive Neutrophils Impacts Epithelial Sodium Channel (ENaC) Endocytosis
Source: MDPI journal article supplement (doi:10.3390/ijms25094939), 2024-04-30
Supplement: s1 [file s1]

Table S1. Mass spectrometry conditions used in the identification and quantification of the biomolecules in neutrophils extract samples

| Analyte                          | Followed ions in SIM mode (m/z) | Drying gas temperature (°C) | Drying gas flow (L min <sup>-1</sup> ) | Capillary voltage (V) | Fragmentator (V) |
|----------------------------------|---------------------------------|-----------------------------|----------------------------------------|-----------------------|------------------|
| 1,2-diacyl-sn-3-phospho-L-serine | 790.4                           | 300                         | 11                                     | 4000                  | 135              |
| L-α-phosphatidylcholine          | 760.5                           |                             |                                        |                       |                  |
| L-α-phosphatidylethanolamine     | 745.4                           |                             |                                        |                       |                  |
| D-sphingosine                    | 300.2                           |                             |                                        |                       |                  |
| Cholesterol                      | 369.3                           | 325                         | 4                                      | 500                   | 135              |
